# Supplementary material
Source: publisher figshare collection journal article supplement (https://frontiersin.figshare.com/ndownloader/files/23767556)
Supplement: Supplementary file [file 23767556]

# Supplementary Figure S1

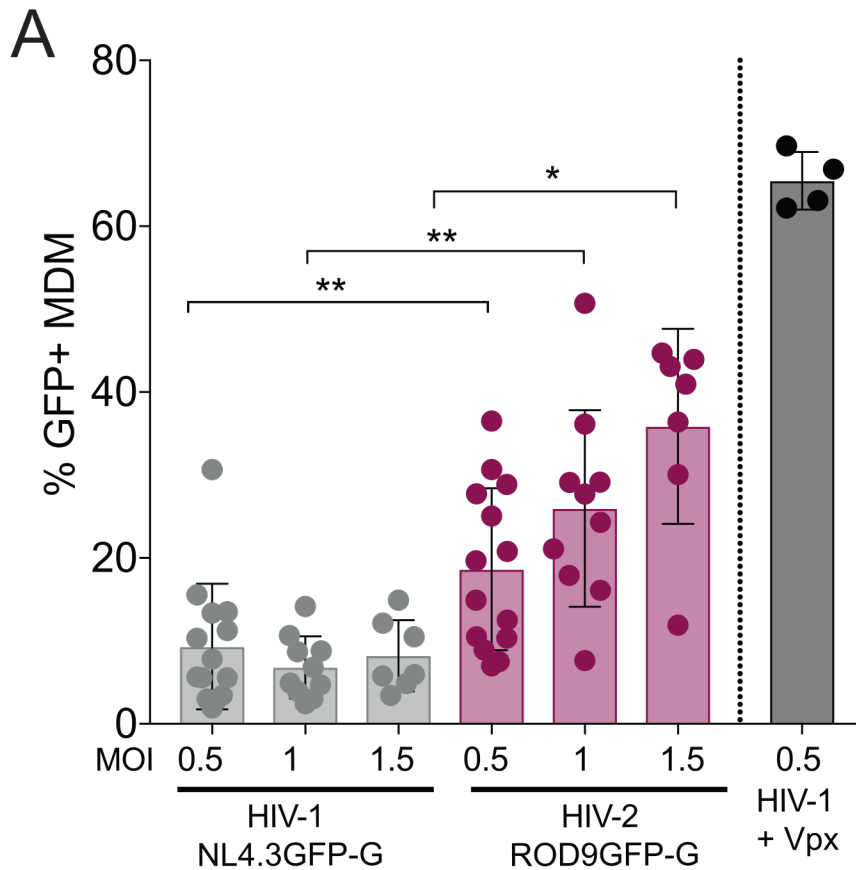

**Figure S1. HIV-2 Vpx increases HIV-1 rates of infection.** MDMs infected with the indicated viruses at different MOIs were harvested at 3dpi to determine their GFP expression. Vpx was delivered in separate lentiviral particles at the time of infection (see methods). P values were calculated using matched-pairs Wilcoxon non-parametric test. P values lower than 0.05 were considered as significant (\* $p < 0.05$ ; \*\* $p < 0.01$ ; \*\*\* $p < 0.001$  and \*\*\*\* $p < 0.0001$ ).
